# Supplementary material for: Genetic and molecular mechanisms underlying the parthenocarpic fruit mutation in tomato
Source: Front Plant Sci. 2024 Mar 27;15:1329949. doi: 10.3389/fpls.2024.1329949 (PMC11004453; doi:10.3389/fpls.2024.1329949)
Supplement: Supplementary file 3 [file Table_1.xlsx]

## Sheet: Table S1
Supplementary Table 1. Primer sequences used in mapping, sequencing and cloning experiments and PCR reaction parameters.
Gene code / Marker name	Use	Arabidopsis unigenes	Tomato ortholog TC/Solyc code	Forward primer			Reverse primer		PCR product length (bp)	TA (°C)	No. of PCR cycles
				Name	Sequence (5’ – 3’)		Name	Sequence (5’ – 3’)
T14/COS T1143	In/del marker	At3g16370.1	TC123815	T1143-1	GGAGAATGGGCATCTACAA		T1143-2	CCTTTAGGATGGATTCCG	1100/900	57	32
T17	CAPS marker (AluI)	At3g16340.1	TC117501	T1143-17-1	TTAGGCCAGGCGTATTGACAG		T1143-17-2	CCATTGTTTCCAGAAGCAGGA	902	57.9	32
T18/SSR 320	SSR marker	At3g16330.1	TC117493	SSR320-1	ATGAGGCAATCTTCACCTGG		SSR320-2	TTCAGCTGATAGTTCCTGCG	172/179	57.3	32
T19	CAPS marker (RsaI)	At3g16320.1	TC125845	T1143-19-1	GTTGAGCTATCTGGCGCAGGTG		T1143-19-2	GCCTGGTATGGGCTTGGAATG	594	59	32
T20	CAPS marker (RsaI)	At3g16310.1	TC117278	T1143-20-1	CTGTTTCTGCTTTATGGCGTGA		T1143-20-2	CTGACGTTGTGTTGGATCCACT	677	58.4	32
T21	In/del marker	At3g16290.1	TC119915	T1143-21-1	CCAGACATATTGGACCCAGCA		T1143-21-2	ACCAGAGCTCATCAGCAGCA	550	59.7	32
F5	CAPS marker (EcoRI)	At1g79990.1	TC226741	T0796-5-1	TCTATGGAACGGCAGTGTGG		T0796-5-2	AACAATGCCATCACCGCA	385	57.3	32
F10/COS T0796	CAPS (AluI)	At1g79940.1	TC181762	T0796-10-1	TTGCTGGCTTCAAGAAAGGC		T0796-10-2	AGTTTGGCCCTTTCACCCTT	805	57.3	32
F16	CAPS marker (EcoRI)	At1g79880.1	TC116946	T0796-F16-1	TCGGAGTATTGATGGCCTGTC		T0796-F16-2	TCAACATGAGGACCACGGC	701	57	32
C2_At1g55170	COSII marker	At1g55170	Solyc03g121500	C2_At1g55170-1	ATTCGCTCCAGGGAACTTATCG		C2_At1g55170-2	AGTAACCAAATTTGTCTCCATTGC	453	60	32
C2_At2g42110	COSII marker	At2g42110	Solyc03g120950	C2_At2g42110-1	AGAAGTTAAAAAGGAGCTCAGATTAGC		C2_At2g42110-2	TTGAGGCCCCTTGTACAGTTCTGCG	996	60	32
GATA9	Sequencing		Solyc03g120890	GATA9-1	TTATCAGCTTCCGATTCTCCA		GATA9-2	AAGAGGAACTGTCGGTGGTG	733	55	32
				GATA9-3	TGATGACTTGGCTGAGCTTG		GATA9-4	CTAGACGCCGGTCGATACTC	534	55	32
				GATA9-5	GGGCCATTAGGTCCAAAAAC		GATA9-6	TGCTAGGATTGCTAGGAACATTT	466	55	32
SEC13-like protein	Sequencing		Solyc03g120900	Solyc03g120900-1	GCATGCCTAGTTCTCGGAATTA		Solyc03g120900-2	AGCAGATCAGAGCCTACAAGAGAG	646	58	32
				Solyc03g120900-3	GATCAGGCTCATCCAGTAGGTG		Solyc03g120900-4	TGTAACATTCTGGACTGAAGGGTT	514	58	32
SlHB15	Sequencing		Solyc03g120910	HD15-prom-1	TGAAGAAGATCTGTTTCTGGG		HD15-prom-2	AACCTGCTCAGGTGTATACC	555	60	32
	Sequencing			HD15-1	ATGGCTTCCTGCAAGGATGG		HD15-2	TCAACAGCAGTTCCAGTAGCC	533	62	32
	Sequencing			HD15-3	AGTAGTGACTAGTGGTCAGC		HD15-4	ACAGGTGGCATACTTGGACC	504	60	32
	Sequencing			HD15-5	TGGTGGAACCATTGAACTCC		HD15-6	AGAAGAGTTCACAAGGATGG	550	60	32
	Sequencing			HD15-7	AATGGTATAGCTGATGAGGG		HD15-8	ATATCTCGTGGCATTATCGC	419	58	32
	Sequencing			HD15-9	AAGTTGGAAGGTCATTCTCC		HD15-10	AATGGCAAACGAAGACCTCC	473	60	32
	Sequencing			HD15-11	CTCGACAGTATGTCCGAAGC		HD15-12	TAGGTATTAGTGTACTGATCC	527	60	32
	CAPS marker (BfaI)			HD9	AAGTTGGAAGGTCATTCTCC		HD10	GGAGGTCTTCGTTTGCCATT	859	57	36
	qRT-PCR			qHB15-1	GGAATGGATGAAAATGCTGTTGGA		qHB15-2	GAGTGAAATAATGCGAAACCCAGA	114	58	40
	CDS cloning			HD11	CCCGGGATGGCTTCCTGCAAGGATGGa		HD12	GAGCTCTTAGACAAATGACCAGTTGACb	2523	60	36
	gRNA synthesis			CRI-HB15-1	ATTGCAGGACTAGCATCCCTCGG		CRI-HB15-2	AAACCCGAGGGATGCTAGTCCTG	41	room T	30 min
	T7E1 assay			CRI-HB15-3	ACAGAGGAAAGAGGCGTCAA		CRI-HB15-4	CTGCCTGACGATGCAAACTA	648	37	36
	In situ_Antisense Probe			Sl_003	CATGGAGTGTGCCTGAAGTC		Sl_005	TAATACGACTCACTATAGGGCCATTCCATCACTATCCAGC	249	55	35
	In situ_Sense Probe			Sl_111	ATTTAGGTGACACTATAGCATGGAGTGTGCCTGAAGTC		Sl_004	CCATTCCATCACTATCCAGC	249	55	35
Unknown protein	Sequencing		Solyc03g120920	Solyc03g120920-1	AAATGGCACCTCATGGAGAG		Solyc03g120920-2	TTGCAGAAGGTACAACCCAAG	587	55	32
Avr9/Cf-9)	Sequencing		Solyc03g120930	Solyc03g120930-1	TGGAACATAGTGCGAATAGC		Solyc03g120930-2	GCTCCCAATCTTCTTCATCCA	773	60	32
Unknown protein	Sequencing			Solyc03g120940-1	CACTAAACACTCACCTCGACTCAG		Solyc03g120940-2	TTTCACATGCTACACACGATCC	612	58	32
			Solyc03g120940	Solyc03g120940-3	GACAGACTAATTGAAATGGAGGGA		Solyc03g120940-4	AGACAAATAGAGGCCAGTGAGAAA	334	58	32
				Solyc03g120940-5	TGTCAGTCTCAGGTCAATGTGC		Solyc03g120940-6	ATGGCTGTGATCTATGAGGAGAA	217	58	32
				Solyc03g120940-7	TGTCTGACCAAGTAGCGGTTTC		Solyc03g120940-8	CTCCACCTATGACGTCCAGG	197	58	32
				Solyc03g120940-9	TGGACTCACTTGTCACTCACACA		Solyc03g120940-10	CTACCAGTCTACCATTACATGCCA	513	58	32
				Solyc03g120940-11	AATGGCATGTAATGGTAGACTGG		Solyc03g120940-12	TGAGATAGAGAGGTTGTTTCCGA	520	58	32
Unknown protein	Sequencing		Solyc03g120950	Solyc03g120950-1	TCGTCTTCCACAATTCACG		Solyc03g120950-2	GATTCGTTTGGTCGGGAA	632	57	32
				Solyc03g120950-3	TTGGTTGAGGTTGTTTCCCT		Solyc03g120950-4	CTCGTCCGTCTTTGGCTT	672	57	32
STIG1	Sequencing		Solyc03g120960	Solyc03g120960-1	CTTCTCATCGCCATCCTTGC		Solyc03g120960-2	TTAGGCACTGACACAAAGGC	450	60	32
GA 2-beta-dioxygenase	Sequencing		Solyc03g120970	SlGA2ox2-1	TTAAAAGCGAAGGGACATGC		SlGA2ox2-2	TCCTCTGCACCAAACAAACTC	627	60	32
				SlGA2ox2-3	GGGATGGAATCTTTGGGATT		SlGA2ox2-4	CAGCCCTTCCTATCACATGC	405	60	32
				SlGA2ox2-5	GGGTCTCTTTTCAGCCTGGT		SlGA2ox2-6	TTGACAAAACATATCCGAAAACC	503	60	32
	Off-target		Solyc04g074040	Solyc04g074040-1	CAGAGGTCGTGGGAGAGGTA		Solyc04g074040-2	GCCAACCAGTTCTAGCAAGC	531	58	36
	Off-target		Solyc12g044410	Solyc12g044410-1	CAAGGCTTCAGGGTGTGAAT		Solyc12g044410-2	ATTTGGACCCACTCAACAG	513	58	36
	Off-target		Solyc03g124010	Solyc03g124010-1	GACAACTGCAGGTGAAGGAAAG		Solyc03g124010-2	CACATGTCCAAATGGGCCCTA	497	58	36
	Off-target		Solyc08g066500	Solyc08g066500-1	AGCAGTTGATTCGGGAGTGT		Solyc08g066500-2	AGCAGTTCCAGTTGCCTTTG	709	58	36
NPT II	Kanamicin resistance			NptII-1	GAGGCTATTCGGCTATGACT		NptII-2	ATCGGGAGCGGCGATACCGT	700	58	36
a SmaI restriction site underlined.
b SacI restriction site underlined.

## Sheet: Table S2
Supplementary Table 2. Annotation and structure of the nine genes located inside the genetic window harbouring the Pat locus, including the two flanking markers.
Gene code (SGN)	Gene description	Arabidopsis best match	No. of exons	Length (bp/aa)
				Gene	mRNA	Protein
Solyc03g120890	Transcription factor GATA9	At5g25830	2	1675	1506	351
Solyc03g120900	Protein transport SEC13-like protein	At2g30050	1	906	906	302
Solyc03g120910	Class III homeodomain-leucine zipper HB15	At1g52150	18	6935	2982	837
Solyc03g120920	Unknown protein	At5g25840	1	555	555	185
Solyc03g120930	Avr9/Cf-9 rapidly elicited protein 146	At3g16330	1	468	468	156
		At1g52140
Solyc03g120940	Unknown protein	At1g15215	9	4628	1287	305
Solyc03g120950	Unknown protein	At2g42110	2	1408	646	131
Solyc03g120960	STIG1	At1g11925	1	432	432	144
		At1g53130
Solyc03g120970	Gibberellin 2-beta-dioxygenase 2	At1g79760	3	2309	1397	380

## Sheet: Table S3
Supplementary Table 3. Tomato and Arabidopsis HD-Zip III genes paired according to their protein sequence similarity.
Tomato genes				Arabidopsis genes				Pairwise protein identity (%)
Name	SGN locus ID	Protein length (aa)		Gene name	TAIR locus ID	Protein length (aa)
SlHB8	Solyc08g066500	827		ATHB8	At4g32880	833		78.9
SlHB9	Solyc02g069830	842		ATHB9	At1g30490	841		73.7
SlHB14	Solyc02g024070	851		ATHB14	At2g34710	852		78.3
SlHB15	Solyc03g120910	836		ATHB15	At1g52150	837		83.7
SlHB15-like	Solyc12g044410	837		-a	-	-		81.5b
SlIFL1	Solyc11g069470	841		IFL1	At5g60690	842		80.9
a Not found
b Identity related to At1g52150.

## Sheet: Table S4
Supplementary Table 4. Genotyping of 21 T0 cv Chico III plants by PCR amplification of the target locus after direct Sanger sequencing and TIDE chromatogram decomposition. Position of deletion and/or insertion according to the decomposition of the chromatogram signals around the expected cut site, allele frequencies (given as efficiency % and total efficiency %) and P value and R2 statistical par…
Name	NptII	Deletions				Insertions			Total efficiency (%)	R2	No. of fruits in T0	No. of seeds per fruit in T0
		Position	Efficiency (%)	P value		Insertion position	Efficiency (%)	P value
CRI_1A	+	-5	85.1	0		-	-	-	88	0.88	1	0
CRI_1B	+	-5	88.7	0		-	-	-	92.2	0.92	1	0
CRI_1F	+	-5	89.6	0		-	-	-	92.1	0.92	1	0
CRI_1H	+	-5	89.1	0		-	-	-	92.2	0.92	-	-
CRI_3C	+	-	-	-		+1A	88.1	0	91.7	0.92	-	-
CRI_5D	+	-5	88.6	0		-	-	-	91.6	0.92	-	-
CRI_5I	+	-5	88.8	0		-	-	-	91.8	0.92	-	-
CRI_5M	+	-5	88.1	0		-	-	-	91.5	0.92	4	0
CRI_6A	+	-1	91.3	0		-	-	-	92.1	0.92	-	-
CRI_6G	+	-1	85.9	0		-	-	-	90.9	0.92	-	-
CRI_8A	+	-4, -2, -1	7.4, 11.1, 7.6	1.9E-13, 6.1E-29, 1.9E-14		+1T	9.3	7.7E-22	43.1	0.43	-	-
CRI_9A	+	-	-	-		+1A	85.3	0	88.2	0.89	6	15
CRI_9B	+	-	-	-		+1A	88.7	0	91.7	0.92	17	0
CRI_10Aa	+	-5	86.5	0		-	-	-	90.3	0.9	8	0c
CRI_10Bb	+	-7	44.5	0		+1A	39.5	0	86.6	0.87	8	0c
CRI_10Cd	-	-	-	-		0A	-	-	3	0.92	15	>100
CRI_10D	+	-5	94.1	0		-	-	-	97.4	0.97	22	0
CRI_11A	+	-7	46.2	0		+1A	43.3	0	93.6	0.94	15	0
CRI_12A	+	-5	92.3	0		-	-	-	95.5	0.95	-	-
CRI_13A	+	-7	28.9	0		0A, +1A	35.1, 30.3	0	59.2	0.94	-	-
CRI_14A	+	-7, -3	33.3, 32.4	0		0A	29.2	0	65.7	0.95	-	-
aSelected for further studies and reported in the text as GE-1
bSelected for further studies and reported in the text as GE-2
cT1 seed obtained from cuttings
dUntransformed WT control
